# Supplementary material
Source: Springer Nature journal article supplement (https://www.springermedizin.de/resource/supplementary/13054_2013_3056_MOESM3_ESM.pdf/9712594)

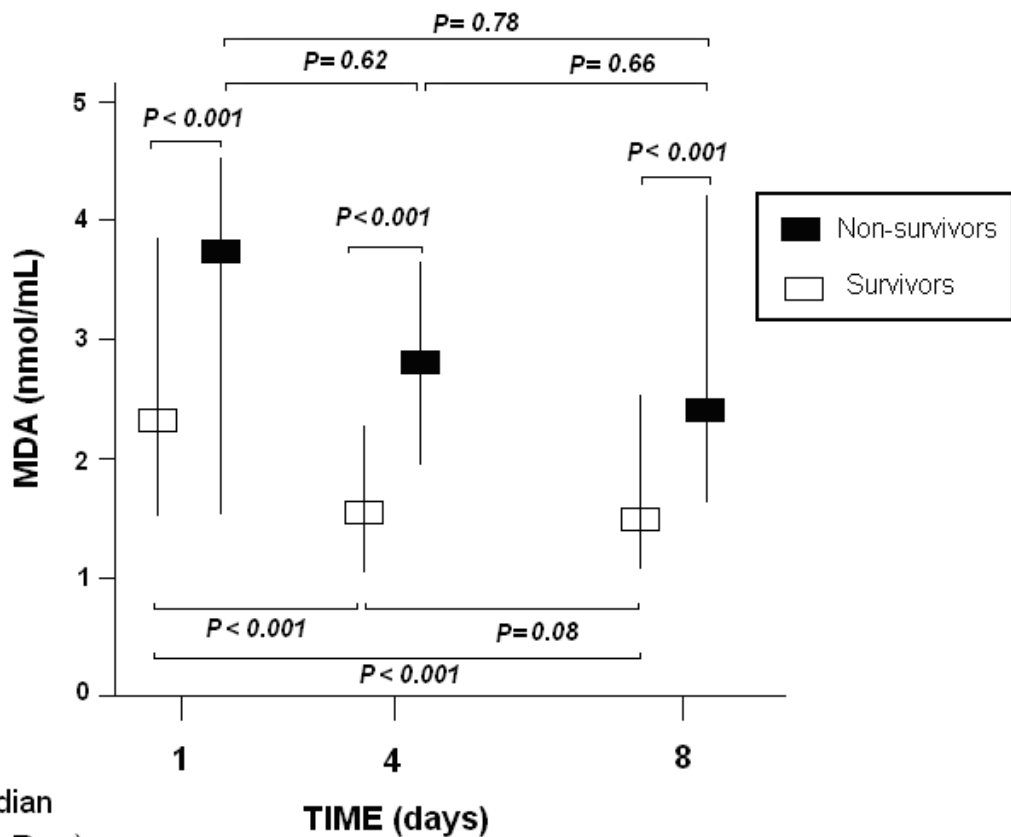

**1**

**4**

**8**

Median

( $P_{25}$ - $P_{75}$ )

Non-survivors

3.71  
(1.65-4.56)

n=113

2.80  
(1.79-3.70)

n=67

2.31  
(1.57-4.23)

n=52

Survivors

2.35  
(1.62-3.81)

n= 215

1.50  
(1.01-2.28)

n=189

1.46  
(1.01-2.49)

n=178

$P < 0.001$

$P = 0.08$

$P < 0.001$

$P < 0.001$

$P = 0.62$

$P = 0.66$

$P = 0.78$

$P < 0.001$

$P < 0.001$

Supplement: MOESM3 [file 9712594]
